# Supplementary material
Source: PubMed Central journal article supplement (PMC6382014)
Supplement: joces-132-220749-s1.pdf [file joces-132-220749-s1.pdf]

**Table S1:** The IFT-A, IFT-B, and BBSome subunits detected in the control (IFT140-G/IFT20-mC) and experiment (IFT140 $\Delta$ WD-G/IFT20-mC) membrane + matrix (M+M) fractions. Fold-change value for the level of each protein in IFT140 $\Delta$ WD-G/IFT20-mC M+M relative to the level of each protein in control M+M is indicated.

[Click here to Download Table S1](#)

**Table S2:** The IFT motor subunits detected in the control (IFT140-G/IFT20-mC) and experiment (IFT140 $\Delta$ WD-G/IFT20-mC) membrane + matrix (M+M) fractions. Fold-change value for the level of each protein in IFT140 $\Delta$ WD-G/IFT20-mC M+M relative to the level of each protein in control M+M is indicated.

[Click here to Download Table S2](#)

**Table S3.** The axonemal components detected in the control (IFT140-G/IFT20-mC) and experiment (IFT140 $\Delta$ WD-G/IFT20-mC) membrane + matrix (M+M) fractions. Fold-change value for the level of each protein in IFT140 $\Delta$ WD-G/IFT20-mC M+M relative to the level of each protein in control M+M is indicated.

[Click here to Download Table S3](#)

**Table S4:** The GTPases detected in the control (IFT140-G/IFT20-mC) and experiment (IFT140 $\Delta$ WD-G/IFT20-mC) membrane + matrix (M+M) fractions. Fold-change value for the level of each protein in IFT140 $\Delta$ WD-G/IFT20-mC M+M relative to the level of each protein in control M+M is indicated.

[Click here to Download Table S4](#)

**Table S5:** The myristoylated proteins detected in the control (IFT140-G/IFT20-mC) and experiment (IFT140 $\Delta$ WD-G/IFT20-mC) membrane + matrix (M+M) fractions. Fold-change value for the level of each protein in IFT140 $\Delta$ WD-G/IFT20-mC M+M relative to the level of each protein in control 'M+M' is indicated.

[Click here to Download Table S5](#)

**Table S6:** The geranygeranylated proteins detected in the control (IFT140-G/IFT20-mC) and experiment (IFT140 $\Delta$ WD-G/IFT20-mC) membrane + matrix (M+M) fractions. Fold-change value for the level of each protein in IFT140 $\Delta$ WD-G/IFT20-mC M+M relative to the level of each protein in control M+M is indicated.

[Click here to Download Table S6](#)

**Table S7:** The ATPases detected in the control (IFT140-G/IFT20-mC) and experiment (IFT140 $\Delta$ WD-G/IFT20-mC) membrane + matrix (M+M) fractions. Fold-change value for the level of each protein in IFT140 $\Delta$ WD-G/IFT20-mC M+M relative to the level of each protein in control M+M is indicated.

[Click here to Download Table S7](#)

**Table S8.** The kinases detected in the control (IFT140-G/IFT20-mC) and experiment (IFT140 $\Delta$ WD-G/IFT20-mC) membrane + matrix (M+M) fractions. Fold-change value for the level of each protein in IFT140 $\Delta$ WD-G/IFT20-mC M+M relative to the level of each protein in control M+M is indicated.

[Click here to Download Table S8](#)

**Table S9.** The phosphatases detected in the control (IFT140-G/IFT20-mC) and experiment (IFT140 $\Delta$ WD-G/IFT20-mC) membrane + matrix (M+M) fractions. Fold-change value for the level of each protein in IFT140 $\Delta$ WD-G/IFT20-mC M+M relative to the level of each protein in control M+M is indicated.

[Click here to Download Table S9](#)

**Table S10:** The transmembrane proteins detected in the control (IFT140-G/IFT20-mC) and experiment (IFT140 $\Delta$ WD-G/IFT20-mC) membrane + matrix (M+M) fractions. Fold-change value for the level of each protein in IFT140 $\Delta$ WD-G/IFT20-mC M+M relative to the level of each protein in control M+M is indicated.

[Click here to Download Table S10](#)

**Table S11:** The channels detected in the control (IFT140-G/IFT20-mC) and experiment (IFT140 $\Delta$ WD-G/IFT20-mC) membrane + matrix (M+M) fractions. Fold-change value for the level of each protein in IFT140 $\Delta$ WD-G/IFT20-mC M+M relative to the level of each protein in control M+M is indicated.

[Click here to Download Table S11](#)

**Table S12:** All of the proteins identified in the control (IFT140-G/IFT20-mC) and experiment (IFT140 $\Delta$ WD-G/IFT20-mC) membrane + matrix (M+M) fractions. Fold-change value for the level of each protein in IFT140 $\Delta$ WD-G/IFT20-mC M+M relative to the level of each protein in control M+M is indicated.

[Click here to Download Table S12](#)
